# Supplementary material for: Weakened effectiveness of short-term emission controls for major events in Chinese cities
Source: Research Square preprint supplement (doi:10.21203/rs.3.rs-4998120/v1), 2024-09-25
Supplement: Supplementary file 1 [file 5cd6f4f748a2045c508f398b.pdf]

1 **SUPPLEMENTARY MATERIALS**

2 Supplementary Texts:

3 1. Evaluation of the a posteriori NO<sub>x</sub> emissions and the bottom-up emission inventory

4 2. Uncertainty analyses of NO<sub>x</sub> emission inversion

5

6 Supplementary Figs. S1 to S18

7

8 Supplementary Tables S1 to S11

9

10 **Supplementary Text 1: Evaluation of the a posterior NO<sub>x</sub> emissions and the**  
11 **bottom-up emission inventory**

12 With the inversion system combining RETOMI2 constraints and MEIC, the a  
13 posterior emissions were estimated to track the short-term variations of NO<sub>x</sub>  
14 emissions around the events. As shown in Supplementary Table S1, the a posterior  
15 emissions of NO<sub>x</sub> were 6-29% lower than MEIC, the current best available emission  
16 data with the “bottom-up” approach, for the main control periods of all the concern  
17 events in YRD. Furthermore, the a posteriori emissions considerably improved the  
18 model performance of surface NO<sub>2</sub> and O<sub>3</sub> concentration simulation with WRF-  
19 CMAQ (Supplementary Table S2-S3). Specifically, the correlation coefficients (R)  
20 between simulation and observation were elevated by about 0.02-0.1 and 0.01-0.41  
21 for NO<sub>2</sub> and O<sub>3</sub>, respectively. The normalized mean bias (NMB) and normalized mean  
22 error (NME) of NO<sub>2</sub> were reduced from 50% to -4% and from 51% to 23%,  
23 respectively, and the analogues numbers were from -22% to 18% and from 33% to  
24 32% for O<sub>3</sub>. Note reductions in NO<sub>x</sub> emissions during the concern periods always  
25 enhanced O<sub>3</sub> concentrations, attributed to a prevailing “VOC-limited” O<sub>3</sub> formation  
26 regime in YRD, under which O<sub>3</sub> is more sensitivity to volatile organic compounds  
27 (VOC) and can be removed through “titration reaction” with NO<sup>1-3</sup>.

28

29 Reference:

- 30 1. Y. M. Liu, T. Wang, Worsening urban ozone pollution in China from 2013 to 2017-  
31 Part 2: The effects of emission changes and implications for multi-pollutant control.  
32 *Atmos. Chem. Phys.* **20**, 6323-6337 (2020).
- 33 2. Y. T. Wang, Y. Zhao, Y. M. Liu, Y. Q. Jiang, B. Zheng, J. Xing, Y. Liu, S. Wang, C.  
34 P. Nielsen, Sustained emission reductions have restrained the ozone pollution over  
35 China. *Nat. Geosci.* **16**, 967-974 (2023).
- 36 3. X. Y. Dong, Y. Gao, J. S. Fu, J. Li, K. Huang, G. S. Zhuang, Y. Zhou, Probe into  
37 gaseous pollution and assessment of air quality benefit under sector dependent  
38 emission control strategies over megacities in Yangtze River Delta, China. *Atmos.*  
39 *Environ.* **79**, 841-852 (2013).

40

41

## 42 **Supplementary Text 2: Uncertainty analyses of NO<sub>x</sub> emission inversion**

### 43 **The “smearing” effect**

44 For the “top-down” emission inversion, “smearing” effect exists in the mass  
45 balance method when correcting the NO<sub>x</sub> emissions according to the difference  
46 between observed and simulated NO<sub>2</sub> TVCDs in every single grid. It resulted mainly  
47 from the insufficient consideration of the regional transport of NO<sub>2</sub> in the NO<sub>x</sub>  
48 emission inversion, and possibly leads to underestimation in local emissions and  
49 overestimation in downwind emissions.

50 To evaluate the uncertainty from “smearing” effect, we conducted an extra  
51 sensitivity test for estimating the a posterior NO<sub>x</sub> emissions for the major events, with  
52 the same simulation domain as the normal case (Domain 2 in Supplementary Figure  
53 S2) but a coarser horizontal resolution of 27×27 km. Supplementary Table S6 shows  
54 the comparison of the a posterior NO<sub>x</sub> emissions in normal and sensitivity case,  
55 indicated by the correlation coefficient (R), NMB and NME between the two  
56 estimates. The strong coefficients and small NMEs for all the major events suggest a  
57 limited effect of horizontal resolution and thereby “smearing” effect on emission  
58 inversion.

59

### 60 **The sensitivity test of sector-level emission decomposition**

61 The uncertainty of sector-level emission estimation was tested by changing the  
62 criterion of defining the main emission sectors of the grid cells. In the normal case,  
63 we defined a sector as the main sector for individual simulation grid cell if it  
64 accounted for more than 50% of total emissions (Methods). Here we changed the  
65 criterion to 40% and 60%, and repeated the decomposition of sector-level emissions  
66 respectively.

67 Supplementary Table S7 shows the comparison of the inversed sector-level  
68 emissions with different criteria, indicated by R, NMB and NME between different  
69 estimates. The large R (>0.8 for most cases) and small NMEs (<20%) suggest the  
70 uncertainty from changing criterion of defining main emission sectors was moderate.

71

### 72 **The sensitivity test of $\beta$ (response of NO<sub>2</sub> TVCDs to changing NO<sub>x</sub> emissions)**

73 When estimating the response of NO<sub>2</sub> TVCDs to changing NO<sub>x</sub> emissions, we  
74 applied a 10% perturbation in NO<sub>x</sub> emissions (Methods and Eq. 6). To test this  
75 uncertainty, we changed the NO<sub>x</sub> emission perturbation from 20% to 60%, and  
76 repeated the NO<sub>x</sub> emission inversion for 2014 NMD as an example. As shown in  
77 Supplementary Table S11, the variability of  $\beta$  with emission perturbation ranging  
78 20%-60% was within 10%, compared to that with emission perturbation of 10%.  
79 Therefore, the value of  $\beta$  was not sensitive to varying emission perturbation.

80

82 **Supplementary Figures**

86 **Fig. S1. Host and neighboring cities of the major events in the YRD region.** We  
87 defined neighboring cities as one that borders the host city. The darker colors (green,  
88 blue, orange) represent host cities (Nanjing, Shanghai, and Hangzhou), and the lighter  
89 colors represent neighboring cities.

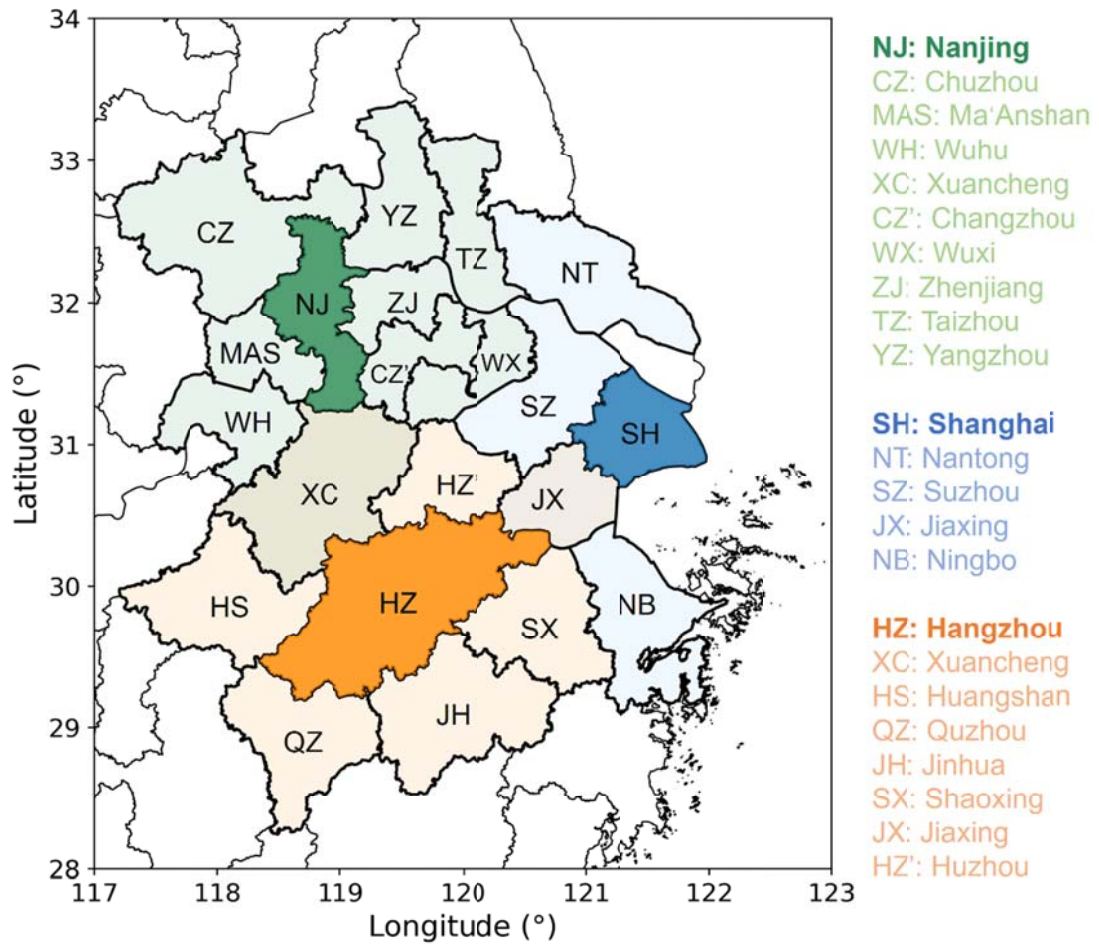

87

88

96 **Fig. S2. Modeling domain of WRF-CMAQ and the locations of meteorological,**  
97 **air quality, and MAX-DOAS measurement stations in YRD.** A nested WRF-  
98 CMAQ model is applied at the horizontal resolution of  $27 \times 27$  km (Domain 1) and  $9$   
99  $\times 9$  km (Domain 2). Domain 1 provided initial and boundary fields for Domain 2,  
100 where the  $\text{NO}_x$  emissions were inverted. The MAX-DOAS measurements were  
101 available at monthly level in Hefei (117.16°E, 31.91°N), Nanjing (118.95°E,  
102 32.118°N) and Shanghai (120.98 °E, 31.09°N), and at daily level in Xuzhou (117.14°  
103 E, 34.22° N).

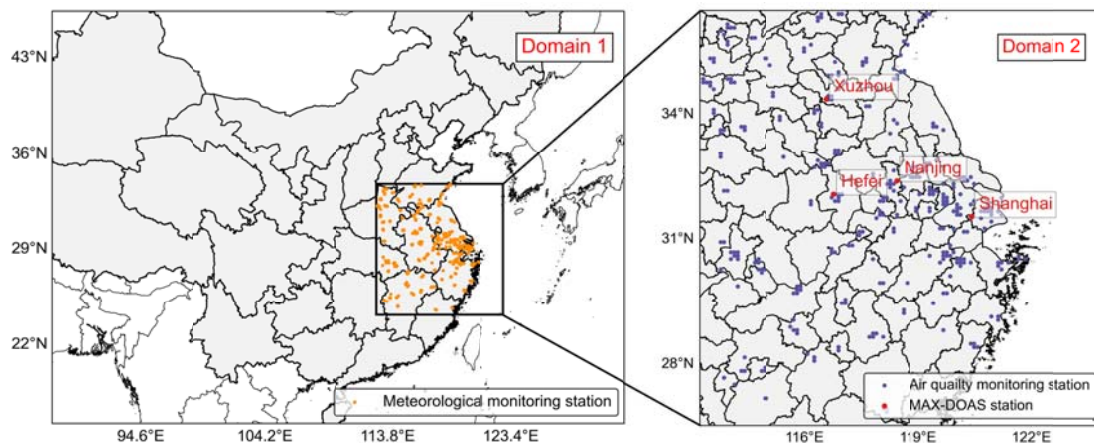

102 **Fig. S3. The spatial distribution of standard deviations of NO<sub>2</sub> TVCDs in**  
103 **POMINO and RETOMI2, and the difference between them during the main**  
104 **control periods of major events. The horizontal resolution is 0.05°×0.05° (Original**  
105 **POMINO data were downscaled by bilinear interpolation).**

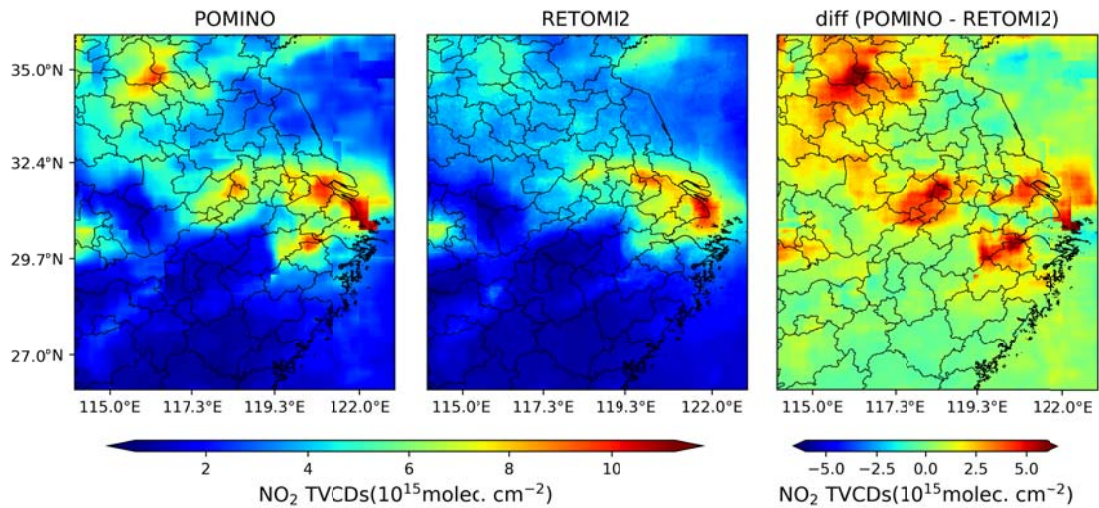

103  
104

110 **Fig. S4. Monthly temporal variation of NO<sub>2</sub> TVCDs from satellite data**  
 111 **(RETOMI2 and POMINO) and ground-based observations from MAX-DOAS at**  
 112 **Hefei (117.16°E, 31.91°N; from January 2014 to December 2016, red curves with**  
 113 **dots), Nanjing (118.95°E, 32.118°N; from October 2015 to December 2016, blue**  
 114 **curves with dots) and Shanghai (120.98 °E, 31.09°N; from April to December**  
 115 **2016, green curves with dots).**

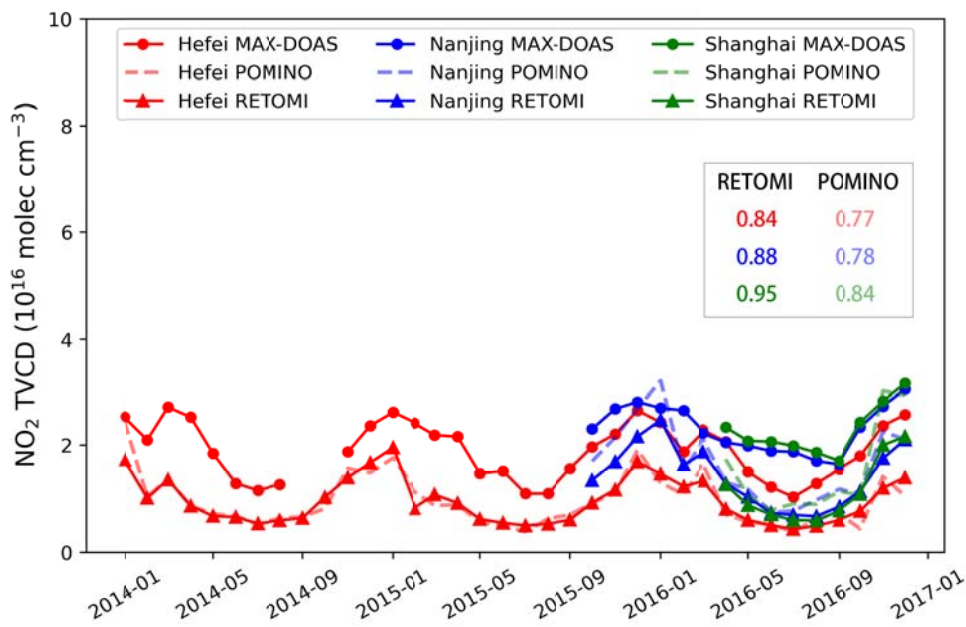

111  
112

118 **Fig. S5. Interannual trends of NO<sub>x</sub> emissions from MEIC during 2008-2020 for**  
 119 **YRD (A, E), Shanghai (B, F), Nanjing (C, G) and Hangzhou (D, H).** The black  
 120 dotted lines represent annual total NO<sub>x</sub> emissions. The red, green and light blue bars  
 121 represent the emissions from industrial, power and transportation sectors, respectively.  
 122 The red, green and light blue dotted lines indicate the relative change in emissions  
 123 from 2008 for the industry, electricity and transportation sectors, respectively.

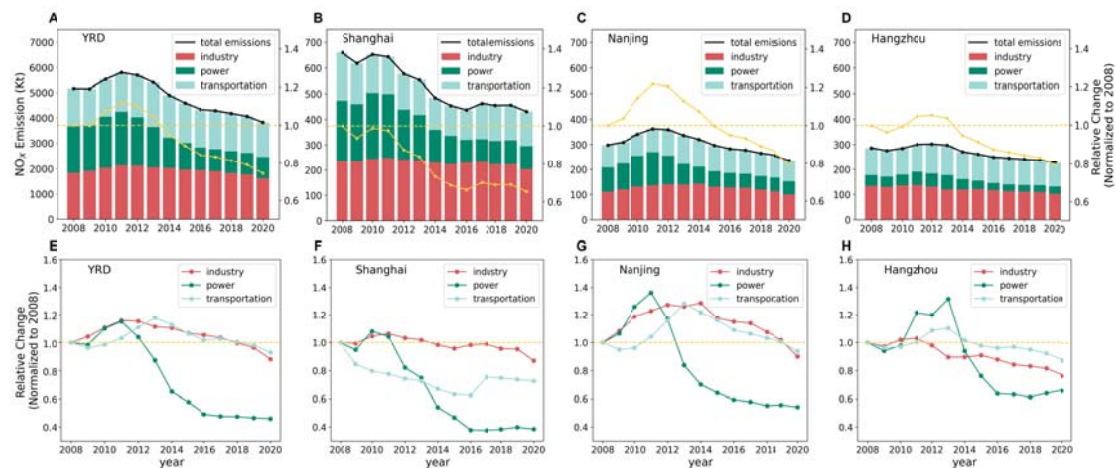

119

120



124 **Fig. S6. Daily variation of observed surface NO<sub>2</sub> concentration in Nanjing in**  
125 **August 2013 and August 2014.** The data for August 2013 and August 2014 are  
126 indicated in blue and orange respectively. Observations during the event are indicated  
127 with red dots.

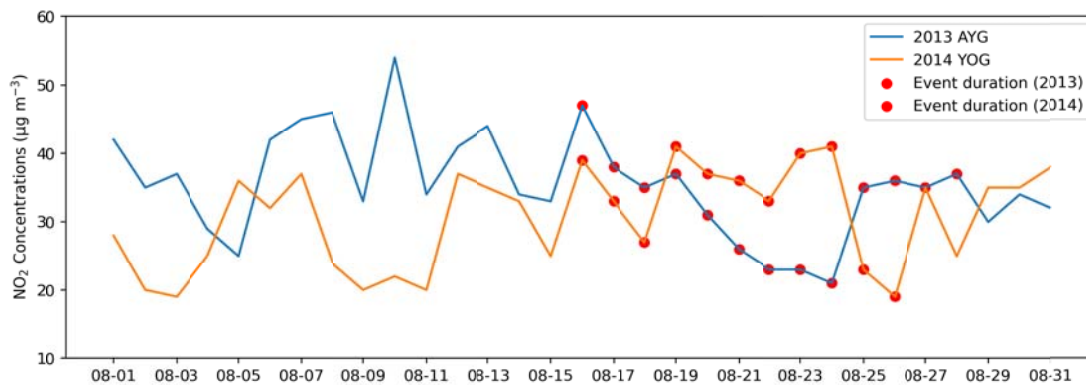

125  
126

134 **Fig. S7. Difference of simulated hourly mean meteorological conditions during**  
 135 **the 2013 AYG and 2014 YOG. Difference is indicated as meteorological factors**  
 136 **on 16-28 August 2013 minus meteorological factors on 16-28 August 2014. (A)**  
 137 **Temperature at 2m (T2), (B) Relative humidity (RH) at 2m, (C) Planetary boundary**  
 138 **layer height (PBLH), (D) Surface pressure (SP), (E) Wind speed and direction at 10-**  
 139 **meter in 2013 AYG, (F) Wind speed and direction at 10-meter in 2014 YOG. The**  
 140 **boxes in the upper right corner show the bias of mean value (A-D) or the mean value**  
 141 **of wind speed (E, F). The black box in each plot shows the location of Nanjing.**

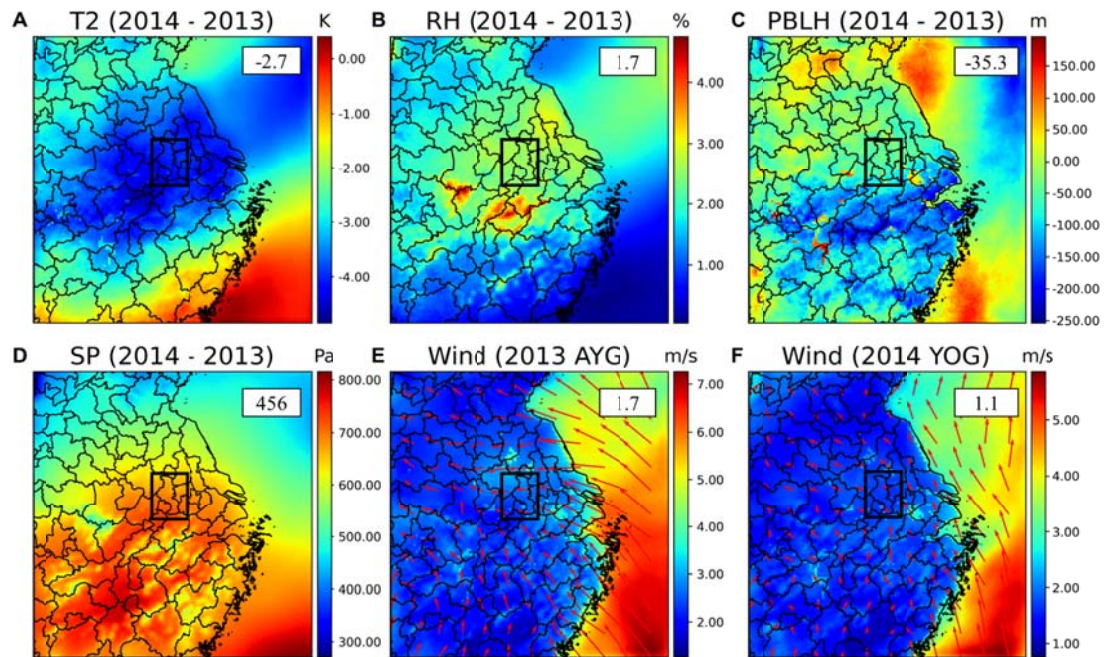

135  
136

142 **Fig. S8. Time series of daily observed concentrations of air pollutants (SO<sub>2</sub>, NO<sub>2</sub>,**  
 143 **CO, O<sub>3</sub>, PM<sub>2.5</sub> and PM<sub>10</sub>), meteorological parameters (temperature, rainfall,**  
 144 **wind speed at 10-meter, relative humidity, sunshine duration and PBLH) and the**  
 145 **a NO<sub>x</sub> posterior emissions in Hangzhou from August to September 2016. The red**  
 146 **shade indicates the G20 summit period (Sep. 4 - Sep. 5, 2016). The grey shade**  
 147 **indicates Phase II (Aug. 28 - Sep. 6, 2016) in main control period of 2016 G20.**

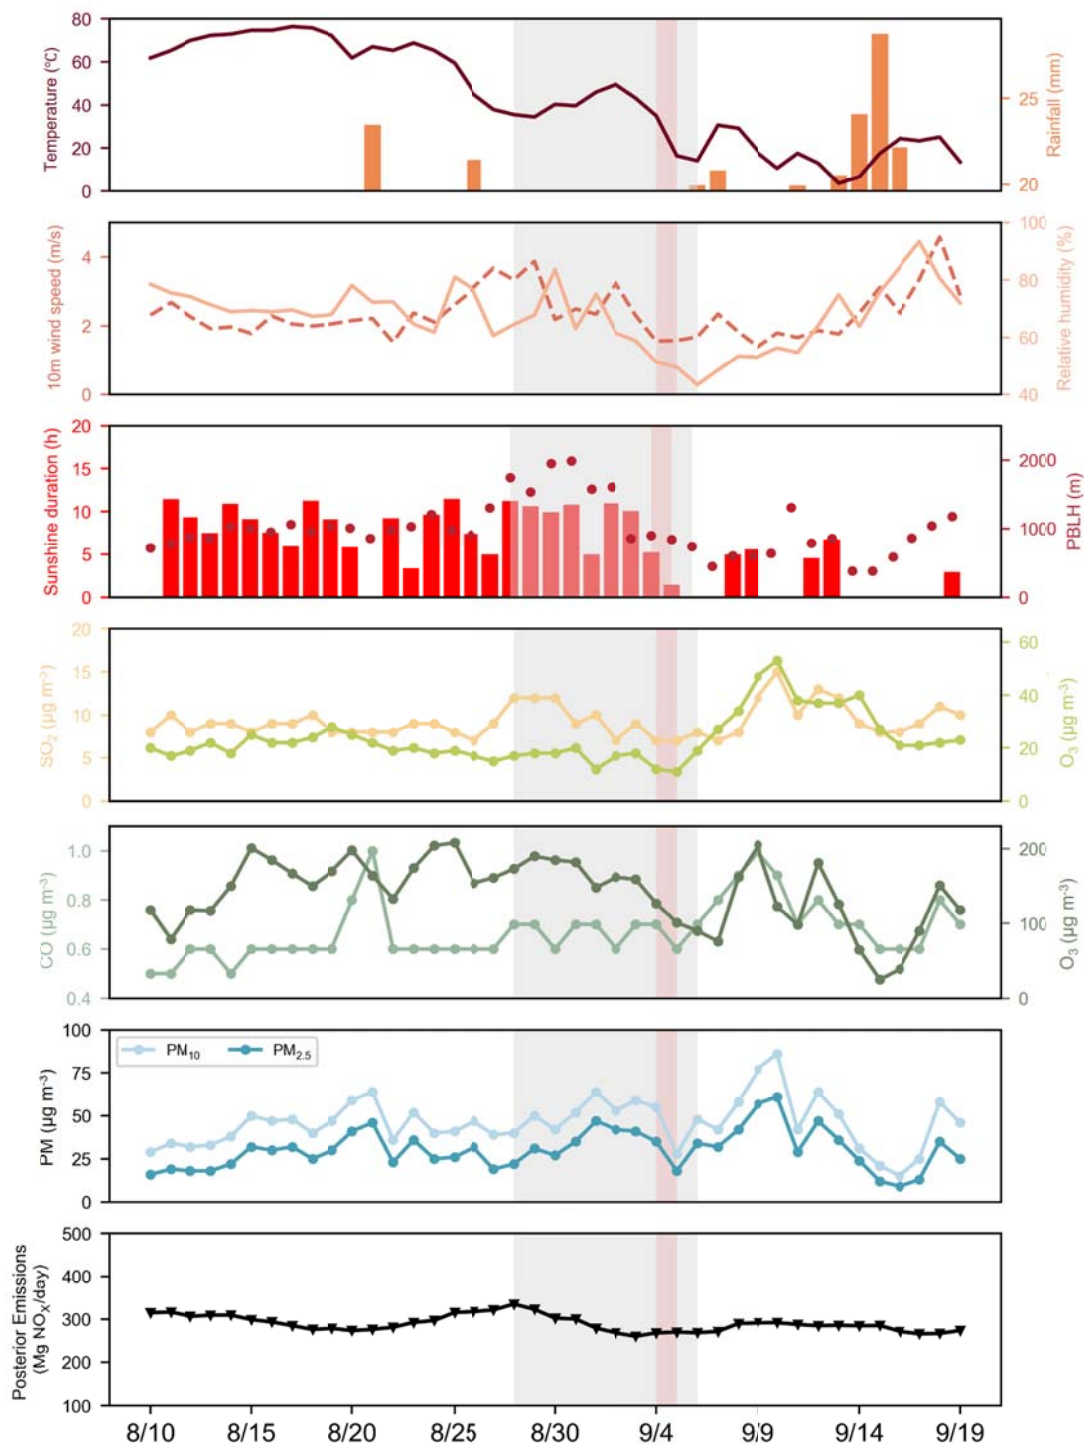

143

145 **Fig. S9. The timeline of major events and long-term air pollution prevention**  
 146 **actions and mechanisms.**

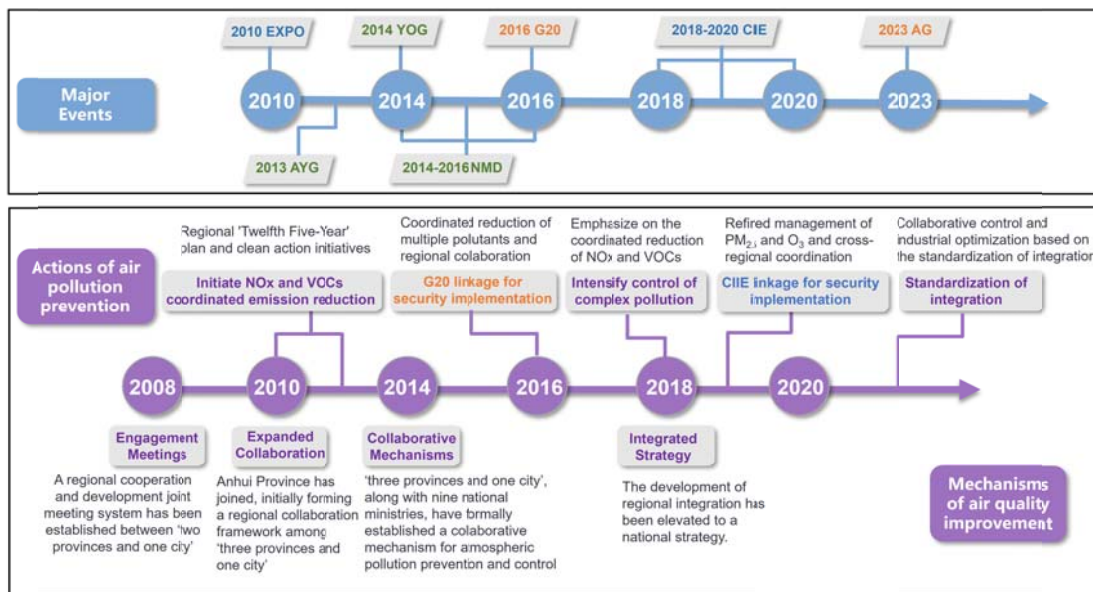

146

147 **Fig. S10. The methodological flowchart of the study.**

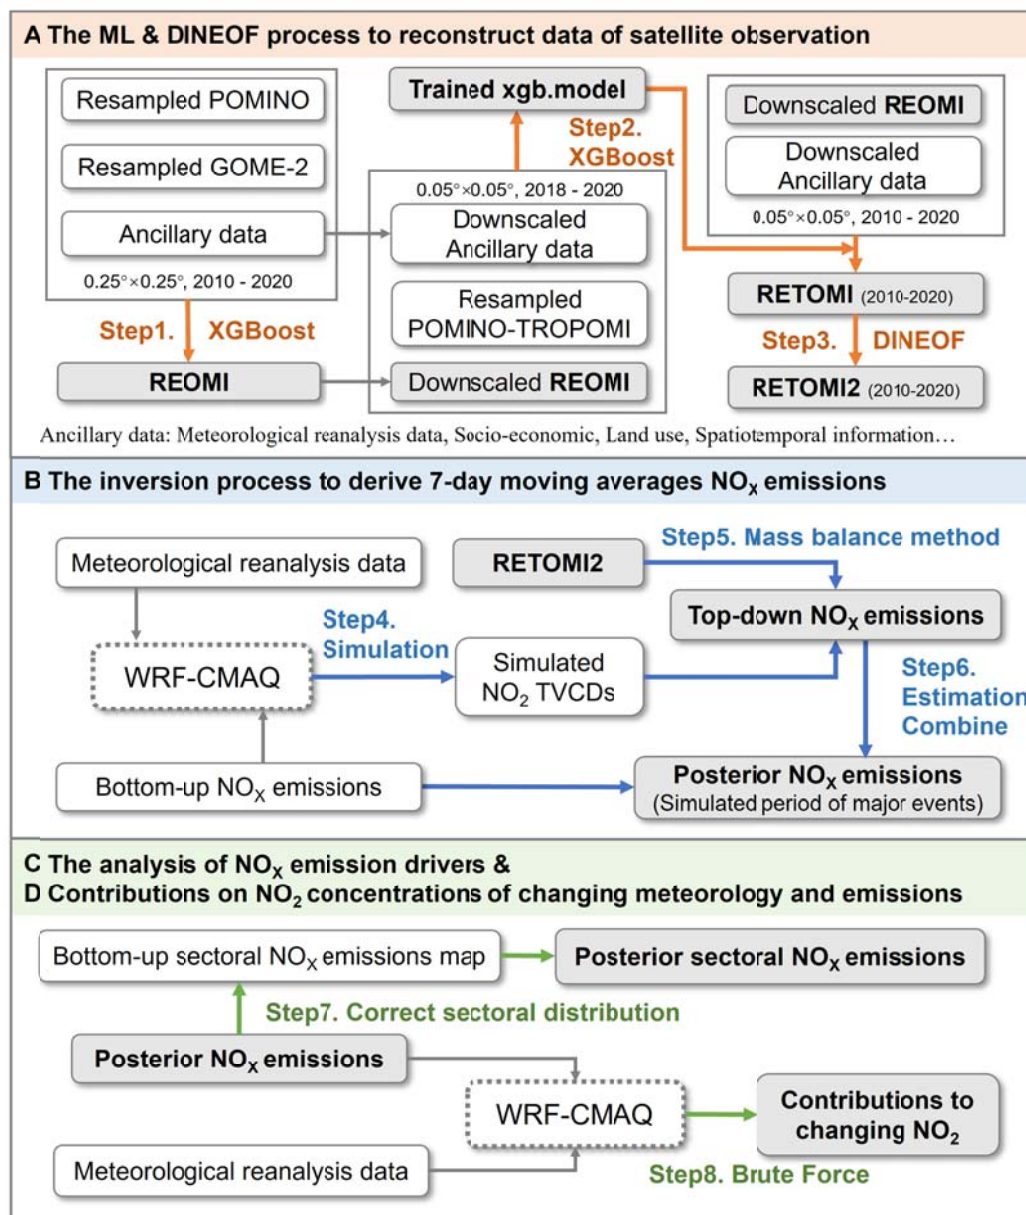

148



151 **Fig. S11. Scatterplot of historical NO<sub>2</sub> TVCDs from POMINO-TROPOMI and**  
152 **RETOMI (Jul.1, 2018 to Dec. 31, 2020).** The slope and intercept were applied to  
153 adjust POMINO-TROPOMI data during the simulation period of 2023 AG.

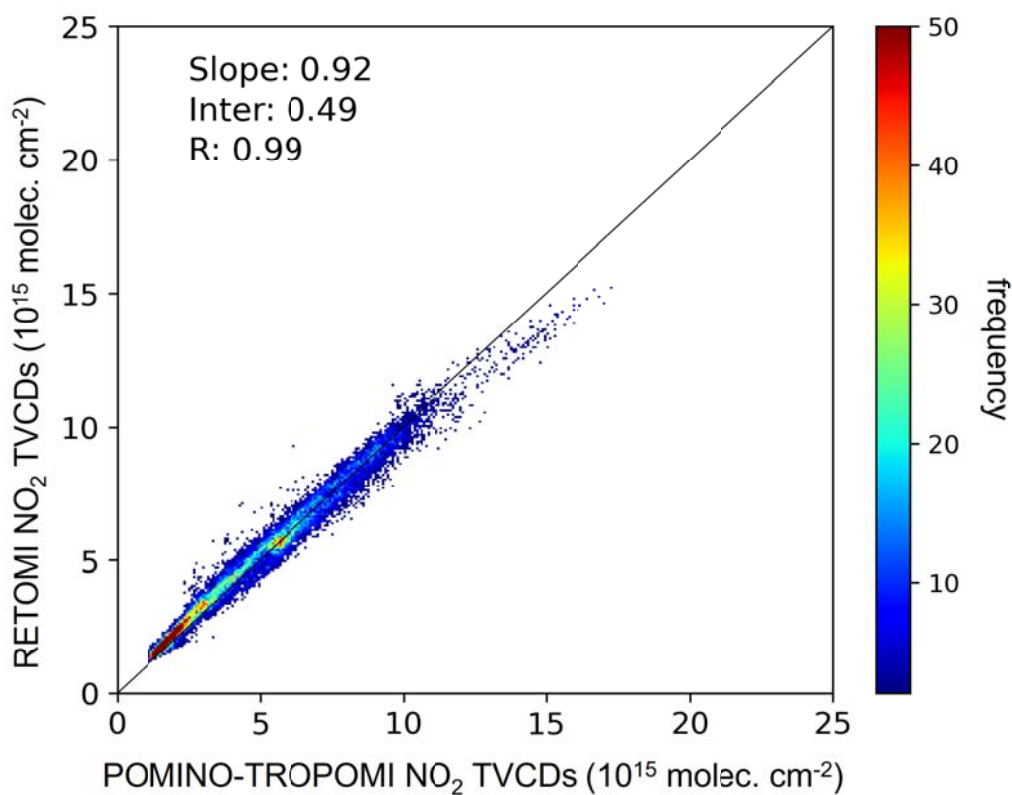

152  
153

157 **Fig. S12. Scatterplot of historical averaging kernels of RETOMI (REAK) and**  
158 **POMINO-TROPOMI (Jul.1, 2018 - Dec. 31, 2020).** The slope and intercept were  
159 applied to adjust the AKs of POMINO-TROPOMI during the simulation period of  
160 2023 AG.

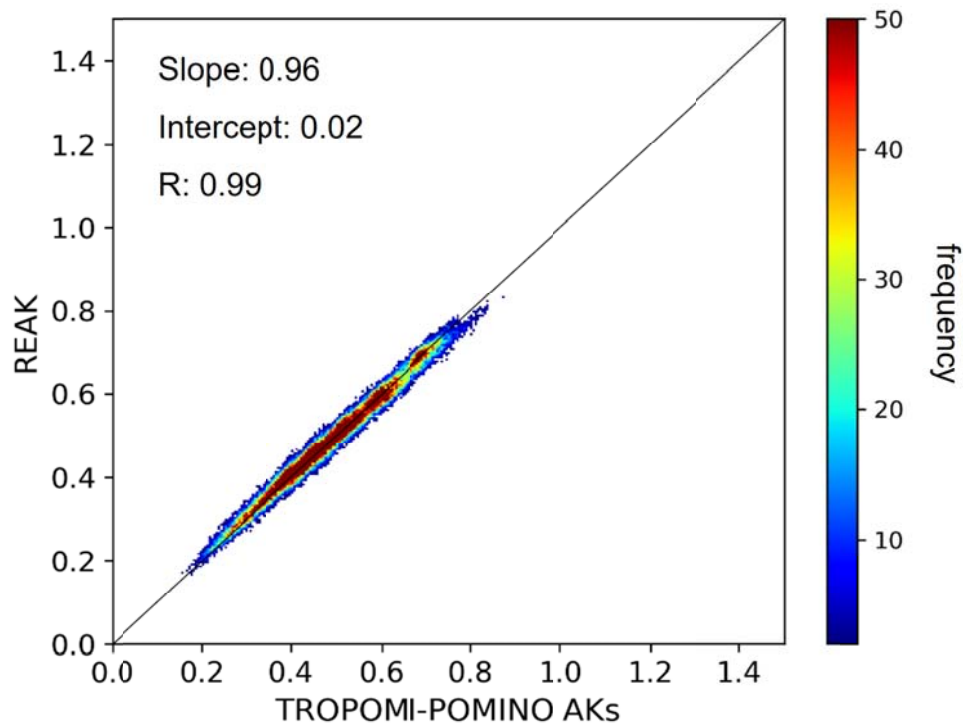

158  
159

161 **Fig. S13. Scatterplot of NO<sub>2</sub> TVCDs from REOMI and POMINO (left and right**  
 162 **panels for each year indicate the training and validation dataset, respectively).**

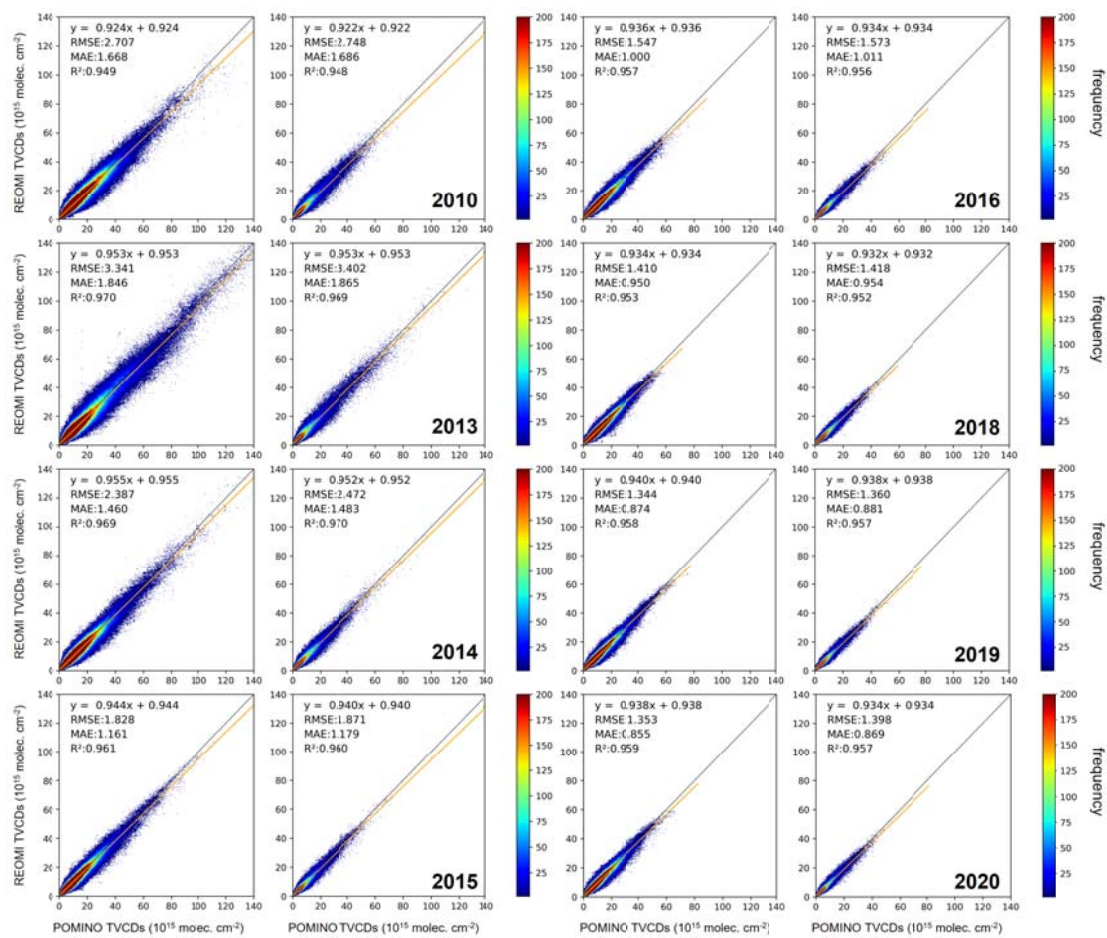

162  
163



165 **Fig. S14. Scatterplot of NO<sub>2</sub> TVCDs from RETOMI and POMINO-TROPOMI**  
166 **(left and right panel indicate the training and validation dataset, respectively).**

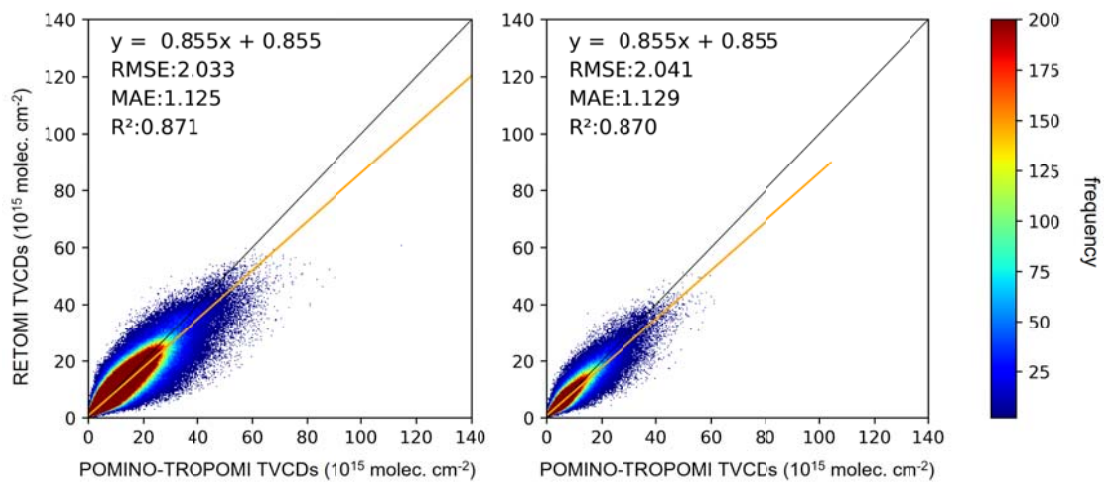

166  
167

169 **Fig. S15. Scatterplot of REAK and POMINO-TROPOMI AKs (left and right**  
170 **panels indicate train and test dataset, respectively).**

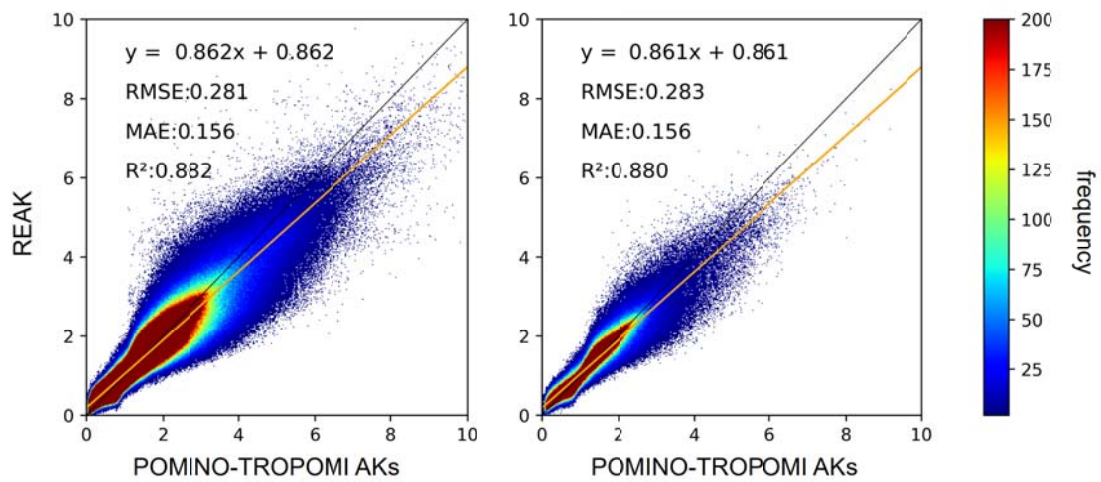

170  
171

176 **Fig. S16. The influence of Expected Error (*RMSE*) by number of EOFs modes**  
177 **(*P*) in DINEOF.** Take a specific event (2014 NMD) as an example.  $P_b$  is the specific  
178 number of EOFs modes set to meet a condition where the *RMSE* change is less than  
179 1%. In this case,  $P_b$  was set as 56 ( $RMSE=0.923$ ), the change in *RMSE* between  $P=56$   
180 and  $P=55$  is less than 1%.

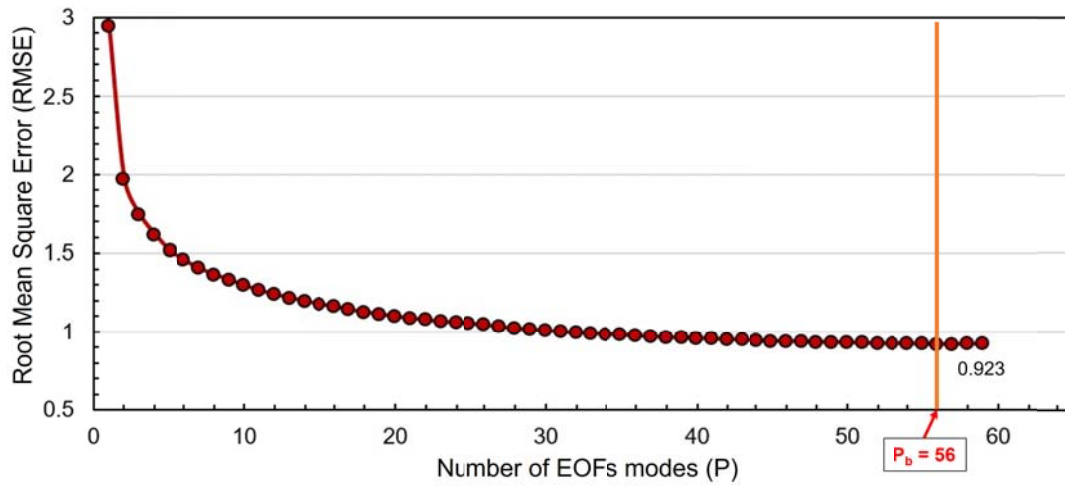

177  
178

180 **Fig. S17. The spatial distribution of  $\beta$  (the sensitivity of NO<sub>2</sub> TVCDs to changing**  
181 **NO<sub>x</sub> emissions) at YRD region during main control period of major events.**

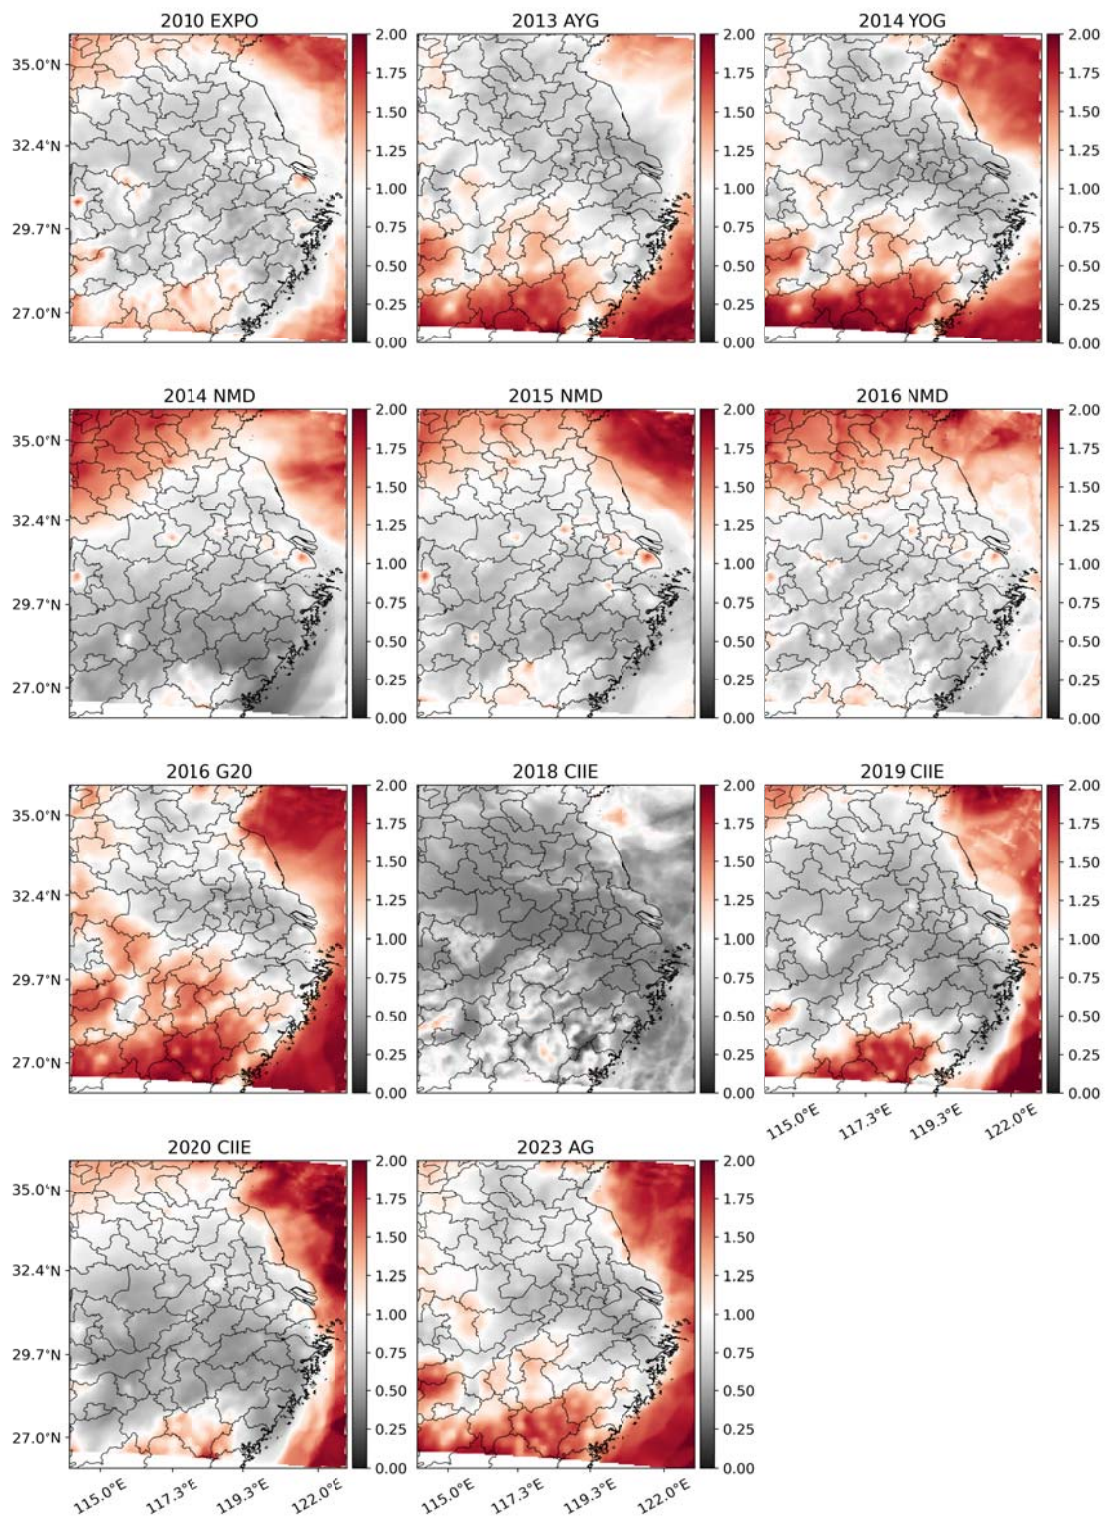

181  
182

184 **Fig. S18. Scatterplot of NO<sub>2</sub> TVCDs from RETOMI2 and WRF-CMAQ**  
185 **simulation by month.**

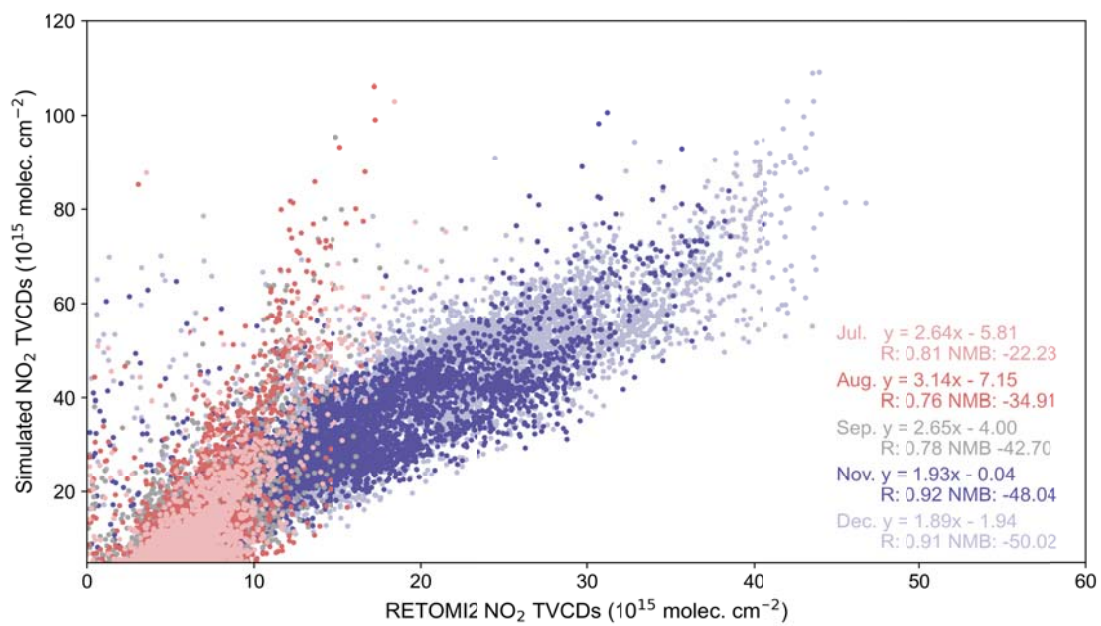

185

185 **Supplementary Tables**

186 **Table S1. The bottom-up (MEIC) and the a posteriori NO<sub>x</sub> emissions (units: Gg NO<sub>x</sub>) and the relative difference (Diff) between them in**  
 187 **YRD during the simulation period of the 11 major events.**

| Event     | YRD (Gg NO <sub>x</sub> ) |                  |      | Host city (Gg NO <sub>x</sub> ) |      |                  |      |
|-----------|---------------------------|------------------|------|---------------------------------|------|------------------|------|
|           | MEIC                      | The a posteriori | Diff | City                            | MEIC | The a posteriori | Diff |
| 2010 EXPO | 5651                      | 4714             | -17% | Shanghai                        | 351  | 250              | -41% |
| 2013 AYG  | 1798                      | 1608             | -11% | Nanjing                         | 48   | 38               | -24% |
| 2014 YOG  | 1628                      | 1467             | -10% | Nanjing                         | 46   | 34               | -33% |
| 2014 NMD  | 1078                      | 764              | -29% | Nanjing                         | 30   | 20               | -47% |
| 2015 NMD  | 1022                      | 777              | -24% | Nanjing                         | 28   | 18               | -53% |
| 2016 G20  | 980                       | 773              | -21% | Hangzhou                        | 27   | 20               | -33% |
| 2016 NMD  | 1432                      | 1321             | -8%  | Nanjing                         | 40   | 34               | -17% |
| 2018 CIIE | 844                       | 792              | -6%  | Shanghai                        | 46   | 40               | -15% |
| 2019 CIIE | 838                       | 746              | -11% | Shanghai                        | 49   | 34               | -46% |
| 2020 CIIE | 848                       | 748              | -12% | Shanghai                        | 50   | 35               | -44% |
| 2023 AG   | 1361                      | 1162             | -15% | Hangzhou                        | 42   | 35               | -21% |

188 **Table S2. The model performance of surface NO<sub>2</sub> concentration with the a**  
 189 **posterior emissions and the bottom-up estimates (MEIC).** Numbers in red indicate  
 190 that the simulation of the a posteriori emission performed better than MEIC. The  
 191 evaluation period was the main control period of major events.

| Event     | Emission data | Observation mean (YRD) | Simulation Mean (YRD) | R    | NMB    | NME   |
|-----------|---------------|------------------------|-----------------------|------|--------|-------|
| 2014 YOG  | MEIC          | 29.21                  | 51.16                 | 0.75 | 76.50  | 76.73 |
|           | Posterior     |                        | 37.11                 | 0.75 | 1.05   | 27.35 |
| 2014 NMD  | MEIC          | 48.02                  | 63.81                 | 0.75 | 32.89  | 34.11 |
|           | Posterior     |                        | 37.97                 | 0.81 | -20.93 | 23.26 |
| 2015 NMD  | MEIC          | 43.13                  | 61.40                 | 0.69 | 43.86  | 43.94 |
|           | Posterior     |                        | 38.53                 | 0.67 | -10.67 | 22.28 |
| 2016 G20  | MEIC          | 22.62                  | 39.98                 | 0.68 | 75.98  | 77.25 |
|           | Posterior     |                        | 24.01                 | 0.70 | 6.14   | 34.85 |
| 2016 NMD  | MEIC          | 47.08                  | 59.14                 | 0.68 | 25.62  | 29.22 |
|           | Posterior     |                        | 38.05                 | 0.62 | -19.18 | 26.43 |
| 2018 CIIE | MEIC          | 37.32                  | 54.54                 | 0.69 | 46.14  | 46.89 |
|           | Posterior     |                        | 32.40                 | 0.78 | -13.17 | 19.99 |
| 2019 CIIE | MEIC          | 36.42                  | 52.24                 | 0.80 | 43.46  | 44.56 |
|           | Posterior     |                        | 37.74                 | 0.84 | 3.62   | 21.04 |
| 2020 CIIE | MEIC          | 34.67                  | 49.86                 | 0.73 | 43.78  | 45.21 |
|           | Posterior     |                        | 37.19                 | 0.82 | 7.24   | 20.47 |
| 2023 AG   | MEIC          | 27.29                  | 43.28                 | 0.84 | 58.58  | 59.75 |
|           | Posterior     |                        | 30.20                 | 0.86 | 10.66  | 12.42 |

192

193



194 **Table S3. The same as Table S2 but for O<sub>3</sub> simulation.**

| Event     | Emission data | Observation mean (YRD) | Simulation mean (YRD) | R           | NMB          | NME          |
|-----------|---------------|------------------------|-----------------------|-------------|--------------|--------------|
| 2014 YOG  | MEIC          | 65.75                  | 56.09                 | 0.87        | -14.68       | 23.15        |
|           | Posterior     |                        | 72.56                 | <b>0.88</b> | <b>9.68</b>  | <b>22.12</b> |
| 2014 NMD  | MEIC          | 70.85                  | 60.15                 | 0.85        | -15.11       | 23.14        |
|           | Posterior     |                        | 70.75                 | 0.85        | <b>-0.14</b> | <b>22.36</b> |
| 2015 NMD  | MEIC          | 47.13                  | 22.22                 | -0.44       | -52.84       | 62.56        |
|           | Posterior     |                        | 47.41                 | <b>0.85</b> | 55.81        | <b>56.54</b> |
| 2016 G20  | MEIC          | 30.47                  | 19.20                 | 0.72        | -37.00       | 40.11        |
|           | Posterior     |                        | 44.98                 | <b>0.74</b> | 48.09        | 52.98        |
| 2016 NMD  | MEIC          | 35.85                  | 24.51                 | 0.71        | -31.62       | 38.10        |
|           | Posterior     |                        | 45.84                 | <b>0.77</b> | <b>27.87</b> | <b>36.77</b> |
| 2018 CIIE | MEIC          | 44.85                  | 36.54                 | 0.77        | -18.53       | 32.42        |
|           | Posterior     |                        | 44.37                 | 0.72        | <b>-1.08</b> | 32.81        |
| 2019 CIIE | MEIC          | 46.07                  | 43.99                 | 0.86        | -4.53        | 25.06        |
|           | Posterior     |                        | 54.41                 | <b>0.88</b> | 18.09        | 27.06        |
| 2020 CIIE | MEIC          | 45.07                  | 33.99                 | 0.84        | -24.57       | 31.94        |
|           | Posterior     |                        | 49.08                 | <b>0.87</b> | <b>8.90</b>  | <b>23.62</b> |
| 2023 AG   | MEIC          | 69.01                  | 68.40                 | 0.84        | -0.87        | 23.13        |
|           | Posterior     |                        | 69.08                 | <b>0.85</b> | <b>0.10</b>  | <b>22.16</b> |

195

196



197 **Table S4. The short-term emission control measures for the major events.**

| Event     | Main control period                 | Specific measures                                                                                                                                                                                                                                                                                                                                                                                                                                                                                                                                                               |
|-----------|-------------------------------------|---------------------------------------------------------------------------------------------------------------------------------------------------------------------------------------------------------------------------------------------------------------------------------------------------------------------------------------------------------------------------------------------------------------------------------------------------------------------------------------------------------------------------------------------------------------------------------|
| 2010 EXPO | Apr. 1 - Oct. 1, 2010               | <p><b>Point sources:</b> All coal-fired boilers, power plants and key industrial factories within a 300-kilometer radius of the Expo site were under priority control. Clean power generation took priority during high pollution period.</p> <p><b>Area sources:</b> Waste straw burning and construction dust emissions were strictly controlled.</p> <p><b>Mobile sources:</b> High-emission vehicles were eliminated or restricted from entering the Expo venue. Zero-emission public transportation systems and tightened vehicle emission standards were implemented.</p> |
| 2013 AYG  | Aug. 1 - Aug. 30, 2013              | <p><b>Point sources:</b> Nearly 60 heavy industrial factories were shut down. Power generation was reduced. The use of coal-fired boilers was prohibited.</p> <p><b>Area sources:</b> The work at all construction sites was stopped. The control of restaurant fume emissions was strengthened. Road cleaning was strengthened.</p> <p><b>Mobile sources:</b> High-emission vehicles were banned from the city.</p>                                                                                                                                                            |
| 2014 YOG  | Phase I:<br>Sep. 15 - Sep. 31, 2014 | <p><b>Point sources:</b> All coal-fired factories were shut down.</p> <p><b>Area sources:</b> The work on one-third of construction sites was stopped.</p> <p><b>Mobile sources:</b> The parking fees in downtown increased sevenfold.</p>                                                                                                                                                                                                                                                                                                                                      |
|           | Phase II:<br>Aug. 1 - Aug. 30, 2014 | <p><b>Point sources:</b> Twenty percent of manufacturing was reduced for heavy industrial factories.</p> <p><b>Area sources:</b> The work at all construction sites was stopped (Aug.16-31). Openair barbecue was stopped</p> <p><b>Mobile sources:</b> High-emission vehicles were banned from entering the city. In total 900 electric buses and 500 taxis were put into operation.</p>                                                                                                                                                                                       |
| 2014 NMD  | Nov. 17 - Dec. 17, 2014             | <p><b>Point sources:</b> The removal efficiencies of air pollutant control facilities were elevated, including gas desulphurization, selective catalytic reduction, and dust collectors. A number of heavy industrial factories were shut down.</p> <p><b>Area sources:</b> The work at all construction sites was stopped. Road cleaning was strengthened.</p> <p><b>Mobile sources:</b> All yellow-labeled and high-emission vehicles were banned from entering the city. Thirty percent of government vehicle use was stopped.</p>                                           |

198 Table S4. (Continued Table)

| Event     | Main control period                 | Specific measures                                                                                                                                                                                                                                                                                                                                                                                                                                                                                                                                                                                                                                                                                                |
|-----------|-------------------------------------|------------------------------------------------------------------------------------------------------------------------------------------------------------------------------------------------------------------------------------------------------------------------------------------------------------------------------------------------------------------------------------------------------------------------------------------------------------------------------------------------------------------------------------------------------------------------------------------------------------------------------------------------------------------------------------------------------------------|
| 2015 NMD  | Dec. 7 - Dec. 15, 2015              | <p><b>Point sources:</b> The removal efficiencies of air pollutant control facilities were elevated. Thirty-one heavy industrial factories were shut down. Key factories reduced manufacturing by 30%.</p> <p><b>Area sources:</b> The work at all construction sites was stopped. Road cleaning was strengthened.</p> <p><b>Mobile sources:</b> Heavy-duty trucks were prohibited from entering the city.</p> <p><b>Emergency Control Measures:</b> Special control measures were implemented during the pollution period. Restrictions on manufacturing were elevated for industries. Further measures were taken to control emissions from vehicles, ships, and dust pollution (Dec. 11 - Dec. 13, 2015).</p> |
| 2016 G20  | Phase I:<br>Aug. 1 - Aug. 27, 2016  | <p><b>Point sources:</b> Heavy industrial factories were shut down or required to reduce production.</p> <p><b>Area sources:</b> The work at all construction sites was stopped (Aug. 25 - Sep. 6).</p>                                                                                                                                                                                                                                                                                                                                                                                                                                                                                                          |
|           | Phase II:<br>Aug. 28 - Sep. 6, 2016 | <p><b>Point sources:</b> Same as Phase I.</p> <p><b>Mobile sources:</b> Vehicles from outside Hangzhou were banned from entering the city. Odd-even traffic rule was implemented (Aug. 28 - Sep. 3).</p>                                                                                                                                                                                                                                                                                                                                                                                                                                                                                                         |
| 2016 NMD  | Dec. 9 - Dec. 13                    | The same as 2015 NMD.                                                                                                                                                                                                                                                                                                                                                                                                                                                                                                                                                                                                                                                                                            |
| 2018 CIIE | Oct. 27 - Nov. 10                   | <p><b>Point sources:</b> The upgrade of coal-fired boilers and production restrictions for key enterprises were strengthened.</p>                                                                                                                                                                                                                                                                                                                                                                                                                                                                                                                                                                                |
| 2019 CIIE | Oct. 27 - Nov. 10                   | <p><b>Area sources:</b> Waste straw burning and construction dust emissions were strictly controlled. Road cleaning was strengthened.</p>                                                                                                                                                                                                                                                                                                                                                                                                                                                                                                                                                                        |
| 2020 CIIE | Nov. 1 - Nov. 10                    | <p><b>Mobile sources:</b> The number of on-road vehicles was restricted. Pollution prevention and control of high-emission vehicles and non-road machinery was strengthened.</p>                                                                                                                                                                                                                                                                                                                                                                                                                                                                                                                                 |
| 2023 AG   | Sep. 10 – Oct. 8                    | <p><b>Point sources:</b> The removal efficiencies of air pollutant control facilities were elevated.</p> <p><b>Area sources:</b> Road cleaning was strengthened.</p> <p><b>Mobile sources:</b> The number of on-road vehicles was restricted. Pollution prevention and control of high-emission vehicles and non-road machinery was strengthened.</p> <p><b>Emergency Control Measures:</b> Platform was established to detect and track the hotspot of pollution.</p>                                                                                                                                                                                                                                           |

199 **Table S5. The simulation periods used to distinguish between meteorological and**  
 200 **emission contributions (P1 and P2).** P2 included the full period of main control for  
 201 each event, with an exception of 2010 EXPO, for which April 2010 was selected as  
 202 P2 to save computational cost. P1 was the period before P2 with the same duration as  
 203 P2.

| <b>Event</b> | <b>P1</b>               | <b>P2</b>               |
|--------------|-------------------------|-------------------------|
| 2010 EXPO    | Mar. 2 - Mar. 31, 2010  | Apr. 1 - Apr. 30, 2010  |
| 2013 AYG     | Jul. 2 - Jul. 31, 2013  | Aug. 1 - Aug. 30, 2013  |
| 2014 YOG     | May. 28 - Jul. 14, 2014 | Jul. 15 - Aug. 31, 2014 |
| 2014 NMD     | Oct. 17 - Nov. 16, 2014 | Nov. 17 - Dec. 17, 2014 |
| 2015 NMD     | Nov. 28 - Dec. 6, 2015  | Dec. 7 - Dec. 15, 2015  |
| 2016 G20     | Jun. 25 - Jul. 31, 2016 | Aug. 1 - Sep. 6, 2016   |
| 2016 NMD     | Dec. 4 - Dec. 8, 2016   | Dec. 9 - Dec. 13, 2016  |
| 2018 CIIE    | Oct. 12 - Oct. 26, 2018 | Oct. 27 - Nov. 10, 2018 |
| 2019 CIIE    | Oct. 12 - Oct. 26, 2019 | Oct. 27 - Nov. 10, 2019 |
| 2020 CIIE    | Oct. 22 - Oct. 31, 2020 | Nov. 1 - Nov. 10, 2020  |
| 2023 AG      | Aug. 12 - Sep. 9, 2023  | Sep. 10 - Oct. 8, 2023  |

204

205 **Table S6 Comparison of the a posteriori emissions inversed at two horizontal**  
 206 **resolutions (27×27 km and 9×9 km) during the main control periods of the 11**  
 207 **major events.**

| <b>Event</b> | <b>R</b> | <b>NMB (%)</b> | <b>NME (%)</b> |
|--------------|----------|----------------|----------------|
| 2010 EXPO    | 0.86     | 1.21           | 4.04           |
| 2013 AYG     | 0.95     | -0.20          | 1.39           |
| 2014 YOG     | 0.91     | 0.89           | 2.88           |
| 2014 NMD     | 0.89     | -0.07          | 2.28           |
| 2015 NMD     | 0.87     | 0.64           | 4.57           |
| 2016 G20     | 0.91     | 0.50           | 3.15           |
| 2016 NMD     | 0.93     | 0.78           | 2.93           |
| 2018 CIIE    | 0.98     | 0.49           | 2.24           |
| 2019 CIIE    | 0.85     | 0.99           | 3.07           |
| 2020 CIIE    | 0.91     | -0.28          | 1.85           |
| 2023 AG      | 0.96     | 1.36           | 4.26           |

208  
 209

210 **Table S7. Variability in the a posteriori NO<sub>x</sub> emissions at the sector level with**  
 211 **different criteria to identify the main emissions sector for individual grid cells.**  
 212 Comparisons were conducted between the estimates with a criterion of 40% and 50%,  
 213 and between the estimates with a criterion of 60% and 50% (see explanation of the  
 214 criterion in Supplementary Texts).

| Event        | Sector         | 40% versus 50% |         |         | 60% versus 50% |         |         |
|--------------|----------------|----------------|---------|---------|----------------|---------|---------|
|              |                | R              | NMB (%) | NME (%) | R              | NMB (%) | NME (%) |
| 2010<br>EXPO | Industry       | 0.91           | -3.61   | 8.64    | 0.96           | -8.25   | 8.93    |
|              | Power          | 0.95           | 3.38    | 9.18    | 0.96           | 15.69   | 15.81   |
|              | Transportation | 0.98           | 0.97    | 3.19    | 0.97           | -8.00   | 8.95    |
| 2013<br>AYG  | Industry       | 0.93           | -1.38   | 2.57    | 0.89           | 0.12    | 2.56    |
|              | Power          | 1.00           | 0.08    | 0.51    | 0.99           | 0.25    | 1.32    |
|              | Transportation | 0.98           | 0.64    | 1.12    | 0.98           | -0.14   | 1.05    |
| 2014<br>YOG  | Industry       | 0.98           | 0.43    | 1.20    | 0.95           | 3.69    | 3.94    |
|              | Power          | 1.00           | -0.21   | 0.45    | 1.00           | 0.38    | 1.16    |
|              | Transportation | 1.00           | -0.21   | 0.61    | 0.98           | -2.32   | 2.46    |
| 2014<br>NMD  | Industry       | 0.99           | -0.21   | 2.63    | 0.98           | -3.71   | 4.72    |
|              | Power          | 1.00           | 0.13    | 0.85    | 0.99           | -3.64   | 3.70    |
|              | Transportation | 1.00           | 0.04    | 1.48    | 0.99           | 3.31    | 3.81    |
| 2015<br>NMD  | Industry       | 0.99           | 0.87    | 2.58    | 0.97           | -1.03   | 5.87    |
|              | Power          | 0.99           | 1.27    | 2.24    | 0.98           | -6.35   | 6.54    |
|              | Transportation | 1.00           | -0.59   | 1.32    | 0.99           | 2.63    | 4.31    |
| 2016<br>NMD  | Industry       | 0.99           | 0.04    | 3.89    | 0.99           | -5.39   | 6.28    |
|              | Power          | 1.00           | -0.76   | 2.11    | 1.00           | -2.71   | 3.12    |
|              | Transportation | 1.00           | 0.10    | 2.02    | 1.00           | 3.73    | 3.87    |
| 2016<br>G20  | Industry       | 0.96           | 0.71    | 1.53    | 0.43           | 17.50   | 17.50   |
|              | Power          | 0.99           | 0.48    | 0.85    | 0.94           | -11.61  | 11.61   |
|              | Transportation | 1.00           | -1.08   | 1.46    | 0.92           | -19.10  | 19.10   |
| 2018<br>CIIE | Industry       | 0.96           | 4.25    | 4.25    | 0.92           | 0.12    | 2.07    |
|              | Power          | 0.99           | -3.60   | 3.60    | 0.98           | 0.02    | 1.42    |
|              | Transportation | 0.91           | -2.77   | 2.86    | 0.97           | -0.16   | 1.31    |
| 2019<br>CIIE | Industry       | 0.90           | 7.61    | 8.84    | 0.92           | 5.69    | 7.83    |
|              | Power          | 0.86           | -12.04  | 14.67   | 0.95           | -3.36   | 4.75    |
|              | Transportation | 0.92           | 0.07    | 6.17    | 0.97           | -3.44   | 4.67    |
| 2020<br>CIIE | Industry       | 0.82           | 14.01   | 14.52   | 0.85           | 1.39    | 8.40    |
|              | Power          | 0.93           | -15.64  | 15.64   | 0.92           | -0.55   | 4.00    |
|              | Transportation | 0.85           | -2.35   | 8.91    | 0.98           | -0.68   | 3.55    |
| 2023<br>AG   | Industry       | 1.00           | 1.43    | 1.48    | 0.94           | 4.12    | 4.39    |
|              | Power          | 1.00           | -0.24   | 0.68    | 0.96           | -1.69   | 2.76    |
|              | Transportation | 1.00           | -1.33   | 1.33    | 0.97           | -3.23   | 3.48    |

215

216 **Table S8. Summary of data used in REOMI development (Step 1).** POMINO and  
 217 GOME-2 data were resampled to  $0.25^\circ \times 0.25^\circ$  through Level-2 products. Other  
 218 ancillary data in this table were downscaled to the same horizontal resolution of  $0.25^\circ$   
 219  $\times 0.25^\circ$  by bilinear interpolation. POMINO was the target variable of the model  
 220 (green shade).

| Data type                         | Variable                         | Abbreviation       | Unit                             | Period                           |
|-----------------------------------|----------------------------------|--------------------|----------------------------------|----------------------------------|
| <b>POMINO</b>                     | NO <sub>2</sub> TVCDs            | pomino             | molec. cm <sup>-2</sup>          | 2010,<br>2013-2016,<br>2018-2020 |
| <b>GOME-2a</b>                    | NO <sub>2</sub> TVCDs            | gome               | molec. cm <sup>-2</sup>          | 2010                             |
| <b>GOME-2b</b>                    | NO <sub>2</sub> TVCDs            | gome               | molec. cm <sup>-2</sup>          | 2013-2016,<br>2018-2020          |
| <b>Meteorology</b>                | 2m temperature                   | t2m                | K                                |                                  |
|                                   | Boundary layer height            | blh                | m                                |                                  |
|                                   | 100-meter eastward wind          | u100               | m s <sup>-1</sup>                |                                  |
|                                   | 100-meter northward wind         | v100               | m s <sup>-1</sup>                |                                  |
|                                   | 10-meter eastward wind           | u10                | m s <sup>-1</sup>                |                                  |
|                                   | 10-meter northward wind          | v10                | m s <sup>-1</sup>                |                                  |
|                                   | Surface pressure                 | sp                 | hPa                              |                                  |
|                                   | Total column ozone concentration | tco3               | du                               |                                  |
|                                   | 2-meter dew point temperature    | d2m                | K                                |                                  |
|                                   | Total Trop. column water         | tcw                | g cm <sup>-2</sup>               |                                  |
| Total column water vapor          | tcwv                             | g cm <sup>-2</sup> | 2010,<br>2013-2016,<br>2018-2020 |                                  |
| <b>Socio-economic</b>             | Gridded population               | pop                | people/grid                      |                                  |
| <b>Land use</b>                   | Proportion of crop               | cropland           | %                                |                                  |
|                                   | Proportion of impervious surface | impervious surface | %                                |                                  |
|                                   | Proportion of water              | water              | %                                |                                  |
|                                   | Proportion of forest             | forest             | %                                |                                  |
| <b>Spatiotemporal information</b> | Longitude                        | lon                | °                                |                                  |
|                                   | Latitude                         | lat                | °                                |                                  |
|                                   | Day of year                      | doy                | -                                |                                  |
|                                   | Day of week                      | dow                | -                                |                                  |

221 **Table S9. Summary of data used in RETOMI development (Step 2).** POMINO-  
 222 TROPOMI data were resampled to 0.05°×0.05° through level-2 products. Other data  
 223 were downscaled to the same horizontal resolution of 0.05°×0.05° by bilinear  
 224 interpolation. POMINO-TROPOMI was the target variable (green shade).

| Data type                         | Variable                            | Abbreviation       | Unit                    | Period                                                                                                                               |
|-----------------------------------|-------------------------------------|--------------------|-------------------------|--------------------------------------------------------------------------------------------------------------------------------------|
| <b>POMINO-TROPOMI</b>             | NO <sub>2</sub> TVCDs               | tpomino            | molec. cm <sup>-2</sup> |                                                                                                                                      |
| <b>REOMI</b>                      | Reconstructed NO <sub>2</sub> TVCDs | reomi              | molec. cm <sup>-2</sup> |                                                                                                                                      |
| <b>Meteorology</b>                | 2m temperature                      | t2m                | K                       | July 2018-Dec. 2020 for training XGBoost model; 2010, 2013-2016, and 2018-2020 for predicting RETOMI2 based on trained XGBoost model |
|                                   | Boundary layer height               | blh                | m                       |                                                                                                                                      |
|                                   | 100-meter eastward wind             | u100               | m s <sup>-1</sup>       |                                                                                                                                      |
|                                   | 100-meter northward wind            | v100               | m s <sup>-1</sup>       |                                                                                                                                      |
|                                   | 10-meter eastward wind              | u10                | m s <sup>-1</sup>       |                                                                                                                                      |
|                                   | 10-meter northward wind             | v10                | m s <sup>-1</sup>       |                                                                                                                                      |
|                                   | Surface pressure                    | sp                 | hPa                     |                                                                                                                                      |
|                                   | Total column ozone concentration    | tco3               | du                      |                                                                                                                                      |
|                                   | 2-meter dew point temperature       | d2m                | K                       |                                                                                                                                      |
| <b>Socio-economic</b>             | Total Trop. column water            | tcw                | g cm <sup>-2</sup>      |                                                                                                                                      |
|                                   | Total column water vapor            | tcwv               | g cm <sup>-2</sup>      |                                                                                                                                      |
|                                   | Gridded population                  | pop                | people/grid             |                                                                                                                                      |
|                                   | Proportion of crop                  | cropland           | %                       |                                                                                                                                      |
| <b>Land use</b>                   | Proportion of impervious surface    | impervious surface | %                       |                                                                                                                                      |
|                                   | Proportion of water                 | water              | %                       |                                                                                                                                      |
|                                   | Proportion of forest                | forest             | %                       |                                                                                                                                      |
| <b>Spatiotemporal information</b> | Longitude                           | lon                | °                       |                                                                                                                                      |
|                                   | Latitude                            | lat                | °                       |                                                                                                                                      |
|                                   | Day of year                         | doy                | -                       |                                                                                                                                      |
|                                   | Day of week                         | dow                | -                       |                                                                                                                                      |

225  
 226  
 227

228 **Table S10. Summary of data used for AKs estimation.** POMINO-TROPOMI data  
 229 were resampled to  $0.05^\circ \times 0.05^\circ$  through level-2 products. Other data were downscaled  
 230 to the same horizontal resolution of  $0.05^\circ \times 0.05^\circ$  by bilinear interpolation. POMINO-  
 231 TROPOMI was the target variable (green shade).

| Data type                         | Variable                         | Abbreviation       | Unit               | Period                                                                                                                                                                  |
|-----------------------------------|----------------------------------|--------------------|--------------------|-------------------------------------------------------------------------------------------------------------------------------------------------------------------------|
| <b>POMINO-TROPOMI</b>             | Daily averaging kernels          | tpomino-ak         | Unitless           |                                                                                                                                                                         |
| <b>POMINO</b>                     | Daily averaging kernels          | pomino-ak          | Unitless           |                                                                                                                                                                         |
| <b>Meteorology</b>                | 2m temperature                   | t2m                | K                  | July 2018-<br>Dec. 2020 for<br>training<br>XGBoost<br>model;<br>2010, 2013-<br>2016, and<br>2018-2020 for<br>predicting<br>REAK based<br>on trained<br>XGBoost<br>model |
|                                   | Boundary layer height            | blh                | m                  |                                                                                                                                                                         |
|                                   | 100-meter eastward wind          | u100               | m/s                |                                                                                                                                                                         |
|                                   | 100-meter northward wind         | v100               | m/s                |                                                                                                                                                                         |
|                                   | 10-meter eastward wind           | u10                | m/s                |                                                                                                                                                                         |
|                                   | 10-meter northward wind          | v10                | m/s                |                                                                                                                                                                         |
|                                   | Surface pressure                 | sp                 | hPa                |                                                                                                                                                                         |
|                                   | Total column ozone concentration | tco3               | du                 |                                                                                                                                                                         |
|                                   | 2-meter dew point temperature    | d2m                | K                  |                                                                                                                                                                         |
|                                   | Total Trop. column water         | tcw                | g/ cm <sup>2</sup> |                                                                                                                                                                         |
| Total column water vapor          | tcwv                             | g/ cm <sup>2</sup> |                    |                                                                                                                                                                         |
| <b>Socio-economic</b>             | Gridded population               | pop                | people/grid        |                                                                                                                                                                         |
| <b>Land use</b>                   | Proportion of crop               | cropland           | %                  |                                                                                                                                                                         |
|                                   | Proportion of impervious surface | impervious         | %                  |                                                                                                                                                                         |
|                                   | Proportion of water              | water              | %                  |                                                                                                                                                                         |
|                                   | Proportion of forest             | forest             | %                  |                                                                                                                                                                         |
| <b>Spatiotemporal information</b> | Longitude                        | lon                | °                  |                                                                                                                                                                         |
|                                   | Latitude                         | lat                | °                  |                                                                                                                                                                         |
|                                   | Day of year                      | doy                | -                  |                                                                                                                                                                         |
|                                   | Day of week                      | dow                | -                  |                                                                                                                                                                         |
| <b>Satellite variables</b>        | Relative azimuth angle           | relazm             | °                  |                                                                                                                                                                         |
|                                   | Solar zenith angle               | sza                | °                  |                                                                                                                                                                         |
|                                   | Viewing zenith angle             | vza                | °                  |                                                                                                                                                                         |
|                                   | Aerosol optical depth            | aod                | Unitless           |                                                                                                                                                                         |
|                                   | Single scattering albedo         | ssa                | Unitless           |                                                                                                                                                                         |
|                                   | Effective cloud fraction         | cldf               | Unitless           |                                                                                                                                                                         |
|                                   | Cloud radiation fraction         | wcld               | Unitless           |                                                                                                                                                                         |



232 **Table S10. (Continued Table)**

| <b>Data type</b>           | <b>Variable</b>                                          | <b>Abbreviation</b> | <b>Unit</b> | <b>Period</b>                                         |
|----------------------------|----------------------------------------------------------|---------------------|-------------|-------------------------------------------------------|
| <b>Satellite variables</b> | NO <sub>2</sub> Trop. air quality factor                 | amf                 | Unitless    |                                                       |
|                            | NO <sub>2</sub> Trop. air quality factor<br>(clear-sky)  | amfclr              | Unitless    | July 2018-Dec.<br>2020 for training<br>XGBoost model; |
|                            | NO <sub>2</sub> Trop. air quality factor<br>(cloudy-sky) | amfld               | Unitless    | 2010, 2013-<br>2016, and 2018-<br>2020 for            |
|                            | Temperature of each layer                                | temp                | K           | predicting REAK<br>based on trained<br>XGBoost model  |
|                            | Tropopause pressure                                      | troppt              | hPa         |                                                       |
|                            | Effective cloud pressure                                 | cldp                | hPa         |                                                       |
|                            | Air pressure of each layer                               | pres                | hPa         |                                                       |
|                            | Surface pressure                                         | spin                | hPa         |                                                       |

233

234

235 **Table S11. The variability of  $\beta$  with different levels of emission perturbation,**  
236 **relative to the value with a 10% perturbation of NO<sub>x</sub> emissions for 2014 NMD.**

| <b>Perturbation of NO<sub>x</sub> emissions</b> | <b>The variation of <math>\beta</math> relative to a 10% perturbation</b> |
|-------------------------------------------------|---------------------------------------------------------------------------|
| 20%                                             | 4.04%                                                                     |
| 30%                                             | 5.82%                                                                     |
| 40%                                             | 6.96%                                                                     |
| 50%                                             | 8.03%                                                                     |
| 60%                                             | 9.34%                                                                     |

237
